# Supplementary material
Source: Research Square preprint supplement (doi:10.21203/rs.3.rs-8639026/v1)
Supplement: Supplementary file 1 [file 00d2b79b7ae6d8e620bf2a4e.xlsx]

## Sheet: Table 1
Author	Year	Entity	Stage	N	positiv N (%)	neg/loss N (%)	Staining pattern N (%)				Clinical relevance
							m	n	c	a	unfavorable clinico-pathology	death/recurrence	associated with
Baumgart et al.	2007	UC	pTa-pT4	739	519 (70.2)	220 (29.8)	-	/ (3.8)$	/ (34.4)$	-	yes	yes	low staining intensity
Broede et al.	2015	AC	pT1-3	11	-	-	-	0 (0.0)	-	-	-	-	-
Bryal et al.	2008	UC	pTa-pT4	153	52 (34.0)	101 (66.0)	-		-	-	yes	no	low staining intensity
Chu et al.	2011	AC	-	4	-	-	-	1 (25.0)	-	-	-	-	-
Clairotte et al.	2006	UC	pT1	71	53 (74.6)	-	53 (74.6)	-	-	18 (25.4)	-	no	aberrant staining
del Muro et al.	2000	UC	pTa-pT4	40	23 (57.5)	17 (42.5)	-	-	-	-	-	yes	negative staining
Elsherif et al.	2017	UC	pTa-pT1	20	18 (90.0)	2 (10.0)	15 (75.0)	2 (10.0)	5 (25.0)	-	yes	-	aberrant staining
Elzamy et al.	2018	UC	pTis-pT4	106	55 (48.1)	-	-	-	-	55 (48.1)	yes	yes	aberrant staining
Hu et al.	2011	UC	pTa-pT4	72	34 (47.2)	-	34 (47.2)	-	-	38 (52.8)	yes	-	aberrant staining
Hu et al.	2013	UC	pTa-pT3	147	146 (99.3)	1 (0.7)	-	-	-	-	yes	-	low staining intensity
Jang et al.	2010	UC	pTa-pT4	80	-	-	-	19 (23.8)	-	-	-	-	-
Jing et al.	2014	UC	pTa-pT4	58	58 (100.0)	0 (0.0)	51 (88.9)	7 (12.1)	-	-	yes		aberrant staining
Kashibuchi et al.	2007	UC	pTa-pT4	55	31 (56.4)	-	31 (56.4)	-	-	24 (43.6)	yes	yes	aberrant staining
Kastritis et al.	2009	UC	pT3-4 or N+	66	37 (56.1)	12 (18.2)	-	17 (25.7)	-	-	-	-	-
Koga et al.	2003	UC	pT1-4	75	38 (50.7)	-	-	-	-	-	-	no	staining intensity
Li et al.	2013	UC	pTa-pT4	24	24 (100.0)	-	24 (100.0)	8 (33.3)	9 (37.5)	-	-	yes	low staining intensity
Liu et al.	2015	UC	pTa-pT1	161	161 (100.0)	0 (0.0)	-	-	-	-	-	no	staining intensity
Mazrya et al.	2019	UC	pTa-pT3	90	57 (63.3)	-	-	-	-	-	no	no	staining intensity
Perrino et al.	2019	UC$	pT1-4	26	-	-	-	0 (0.0)	-	-	-	-	-
Poletajew et al.	2018	UC	pT1 high grade	40	40 (100)	0 (0.0)	-	-	-	-	no	no	staining intensity
Rao et al.	2013	AC	-	25	23 (92.0)	2 (8.0)	23 (92.0)	2 (8.0)	-	-	-	-	-
		UC&	-	11	11 (100.0)	0 (0.0)	11 (100.0)	0 (0.0)	-	-	-	-	-
Rejeb et a.	2024	UC	pTa-pT1	40	12 (30.0)	-	12 (30.0)	-	-	28 (70.0)	yes	yes	aberrant staining
Roy et al.	2012	AC	pT2-4	12	12 (100.0)	0 (0.0)	2 (16.7)	-	-	10 (82.3)	-	-	-
Senol et al.	2015	UC	pTa-pT4	147	69 (46.9)	78 (53.1)	-	-	-	-	yes	yes	high staining intensity
Shiina et al.	2001	UC	pT1-3	5	5 (100.0)	0 (0.0)	-	-	-	-	-	-	-
Stec et al.	2019	UC	pTis-pT1	134	134 (100.0)	0 (0.0)	-	-	-	-	-	-	-
Wang et al.	2001	AC	-	17	15 (88.2)	2 (11.8)	15 (88.2)	0 (0.0)	-	-	-	-	-
		UC	-	10	10 (100.0)	0 (0.0)	10 (100.0)	0 (0.0)	-	-	-	-	-
Zhu et al.	2000	UC	pTis-pT4	46	19 (41.3)	22 (47.8)	-	5 (10.9)	-	-	-	-	-
total (N) / average (%)				2485	70.1	25	67.7	16	31.8	48.6
Samples were considered positive if grouped weak/moderate/strong or 1+/2+/3+. Samples were considered negative if gropued 0 or indicated as negative by the author. Samples were considered high if grouped moderate/strong or 2+/3+ and considered low if grouped weak or +1. Samples were grouped aberrant (cytoplacmic and/or nuclear, heterogeneous, negativ, non-membraneus) if indicated by the author. A…
