# Supplementary material
Source: Research Square preprint supplement (doi:10.21203/rs.3.rs-8639026/v1)
Supplement: Supplementary file 2 [file 1b2c03ddf1396322a47c8ca0.xlsx]

## Sheet: Sup Tabl 1
Author	Year	PMID	Entity	Stage	N	positiv N (%)	neg/loss N (%)	low N (%)	high N (%)	Staining pattern N (%)				Clinical relevance
										m	n	c	a	unfavorable clinico-pathology	death/recurrence	associated with
Baumgart et al.	2007	17363521	UC	pTa-pT4	739	519 (70.2)	220 (29.8)	-	-	-	/ (3.8)$	/ (34.4)$	-	yes	yes	low staining intensity
				pTa-pT1	426	355 (83.3)	71 (16.7)	-	-	-	-	/ (17.9)	-	-	-	-
				pT2-4	313	164 (52.4)	149 (47.6)	-	-	-	-	/ (58.0)	-	-	-	-
Broede et al.	2015	26463756	AC	pT1-3	11	-	-	-	-	-	0 (0.0)	-	-	-	-	-
Bryal et al.	2008	18393367	UC	pTa-pT4	153	52 (34.0)	101 (66.0)	-	-	-		-	-	yes	no	low staining intensity
Chu et al.	2011	21881489	AC	-	4	-	-	-	-	-	1 (25.0)	-	-	-	-	-
Clairotte et al.	2006	16483000	UC	pT1	71	53 (74.6)	-	-	-	53 (74.6)	-	-	18 (25.4)	-	no	aberrant staining
				pT1a	46	34 (73.9)	-	-	-	34 (73.9)	-	-	12 (26.1)	-	-	-
				pT1b	25	19 (76.0)	-	-	-	19 (76.0)	-	-	6 (24.0)	-	-	-
del Muro et al.	2000	10708937	UC	pTa-pT4	40	23 (57.5)	17 (42.5)	-	-	-	-	-	-	-	yes	negative staining
				low grade	16	15 (93.8)	1 (6.2)	-	-	-	-	-	-	-	-	-
				high grade	24	8 (33.3)	16 (66.7)	-	-	-	-	-	-	-	-	-
				pTa-pT1	22	18 (81.8)	4 (18.2)	-	-	-	-	-	-	-	-	-
				pT2-4	18	5 (27.8)	13 (72.2)	-	-	-	-	-	-	-	-	-
Elsherif et al.	2017	26932430	UC	pTa-pT1	20	18 (90.0)	2 (10.0)	-	-	15 (75.0)	2 (10.0)	5 (25.0)	-	yes	-	aberrant staining
Elzamy et al.	2018	30509050	UC	pTis-pT4	106	55 (48.1)	-	-	-	-	-	-	55 (48.1)	yes	yes	aberrant staining
Hu et al.	2011	21672035	UC	pTa-pT4	72	34 (47.2)	-	-	-	34 (47.2)	-	-	38 (52.8)	yes	-	aberrant staining
				low grade	39	23 (59.0)	-	-	-	23 (59.0)	-	-	16 (41)	-	-	-
				high grade	33	11 (33.3)	-	-	-	11 (33.3)	-	-	22 (66.7)	-	-	-
				pTa-pT1	52	29 (55.6)	-	-	-	29 (55.6)	-	-	23 (44.4)	-	-	-
				pT2-4	20	5 (25.0)	-	-	-	5 (25.0)	-	-	15 (75.0)	-	-	-
Hu et al.	2013	22226665	UC	pTa-pT3	147	146 (99.3)	1 (0.7)	68 (47.3)	78 (53.1)	-	-	-	-	yes	-	low staining intensity
				pTa-pT1	87	87 (100.0)	0 (0.0)	36 (41.4)	51 (58.6)	-	-	-	-	-	-	-
				pT2-3	60	59 (98.3)	1 (1.7)	32 (53.3)	27 (45.0)	-	-	-	-	-	-	-
				low grade	48	48 (100.0)	0 (0.0)	9 (18.8)	39 (81.2)	-	-	-	-	-	-	-
				high grade	99	99 (99.0)	1 (1.0)	59 (59.6)	39 (39.4)	-	-	-	-	-	-	-
Jang et al.	2010	20582552	UC	pTa-pT4	80	-	-	-	-	-	19 (23.8)	-	-	-	-	-
				pTa-pT1	56	-	-	-	-	-	5 (8.9)	-	-	-	-	-
				pT2-4	24	-	-	-	-	-	14 (58.3)	-	-	-	-	-
				low grade	34	-	-	-	-	-	2 (5.9)	-	-	-	-	-
				high grade	46	-	-	-	-	-	17 (37.0)	-	-	-	-	-
Jing et al.	2014	24662746	UC	pTa-pT4	58	58 (100.0)	0 (0.0)	-	-	51 (88.9)	7 (12.1)	-	-	yes		aberrant staining
				pTa-pT1	45	45 (100.0)	0 (0.0)	-	-	45 (100.0)	0 (0.0)	-	-	-	-	-
				pT2-4	13	13 (100.0)	0 (0.0)	-	-	6 (46.2)	7 (53.8)	-	-	-	-	-
				low grade	40	40 (100.0)	0 (0.0)	-	-	38 (95.0)	2 (5.0)	-	-	-	-	-
				high grade	18	18 (100.0)	0 (0.0)	-	-	13 (72.2)	5 (27.8)	-	-	-	-	-
Kashibuchi et al.	2007	17760743	UC	pTa-pT4	55	31 (56.4)	-	-	-	31 (56.4)	-	-	24 (43.6)	yes	yes	aberrant staining
				pTa-pT1	20	17 (85.0)	-	-	-	17 (85.0)			3 (15.0)	-	-	-
				pT2-4	35	14 (40%)	-	-	-	14 (40%)			21 (60.0)	-	-	-
Kastritis et al.	2009	18844223	UC	pT3-4 or N+	66	37 (56.1)	12 (18.2)	-	-	-	17 (25.7)	-	-	-	-	-
Koga et al.	2003	14654529	UC	pT1-4	75	38 (50.7)	-	37 (49.3)	-	-	-	-	-	-	no	staining intensity
				pT1	27	17 (63.0)	-	10 (37.0)	-	-	-	-	-	-	-	-
				pT2-4	48	21 (43.8)	-	27 (56.2)	-	-	-	-	-	-	-	-
Li et al.	2013	23447569	UC	pTa-pT4	24	24 (100.0)	-	15 (62.5)	9 (37.5)	24 (100.0)	8 (33.3)	9 (37.5)	-	-	yes	low staining intensity
				pTa-pT1	5	5 (100.0)	-	1 (20.0)	5 (80.0)	5 (100.0)	2 (40.0)	3 (60.0)	-	-	-	-
				pT2-4	19	19 (100.0)	-	14 (74.0)	5 (26.0)	19 (100.0)	6 (31.6)	6 (31.6)	-	-	-	-
Liu et al.	2015	25262382	UC	pTa-pT1	161	161 (100.0)	0 (0.0)	84 (52.2)	77 (47.8)	-	-	-	-	-	no	staining intensity
Mazrya et al.	2019	31114749	UC	pTa-pT3	90	57 (63.3)	-	-	57 (63.3)	-	-	-	-	no	no	staining intensity
				low grade	31	-	-	-	-	- (32.3)	- (67.7)	- (67.7)	-	-	-	-
				high grade	59	-	-	-	-	- (61.0)	- (39.0)	- (39.0)	-	-	-	-
				pTa-pT1	58	-	-	-	-	- (56.3)	- (43.7)	- (43.7)	-	-	-	-
				pT2-3	42	-	-	-	-	- (45.2)	- (54.8)	- (54.8)	-	-	-	-
Perrino et al.	2019	31054897	UC$	pT1-4	26	-	-	-	-	-	0 (0.0)	-	-	-	-	-
Poletajew et al.	2018	30799990	UC	pT1 high grade	40	40 (100)	0 (0.0)	10 (25.0)	30 (75.0)	-	-	-	-	no	no	staining intensity
Rao et al.	2013	23348900	AC	-	25	23 (92.0)	2 (8.0)	0 (0.0)	23 (92.0)	23 (92.0)	2 (8.0)	-	-	-	-	-
			UC&	-	11	11 (100.0)	0 (0.0)	0 (0.0)	11 (100.0)	11 (100.0)	0 (0.0)	-	-	-	-	-
Rejeb et a.	2024	38561917	UC	pTa-pT1	40	12 (30.0)	-	-	-	12 (30.0)	-	-	28 (70.0)	yes	yes	aberrant staining
				low grade	26	11 (42.3)	-	-	-	11 (42.3)	-	-	15 (47.7)	-	-	-
				high grade	14	1 (7.1)	-	-	-	1 (7.1)	-	-	13 (92.9)	-	-	-
				pTa	28	11 (39.3)	-	-	-	11 (39.3)	-	-	17 (60.7)	-	-	-
				pT1	12	1 (8.3)	-	-	-	1 (8.3)	-	-	11 (91.7)	-	-	-
Roy et al.	2012	23121893	AC	pT2-4	12	12 (100.0)	0 (0.0)	-	-	2 (16.7)	-	-	10 (82.3)	-	-	-
Senol et al.	2015	26614845	UC	pTa-pT4	147	69 (46.9)	78 (53.1)	26 (17.7)	43 (29.3)	-	-	-	-	yes	yes	high staining intensity
				pTa-pT1	113	46 (40.7)	67 (59.3)	20 (17.7)	26 (23.0)	-	-	-	-	-	-	-
				pT2-4	34	23 (67.4)	11 (32.4)	6 (17.6)	17 (50.0)	-	-	-	-	-	-	-
				low grade	67	25 (37.3)	42 (62.7)	14 (20.9)	11 (16.4)	-	-	-	-	-	-	-
				high grade	80	44 (55.0)	36 (45.0)	12 (15.0)	32 (40.0)	-	-	-	-	-	-	-
Shiina et al.	2001	11585741	UC	pT1-3	5	5 (100.0)	0 (0.0)	-	5 (100.0)	-	-	-	-	-	-	-
Stec et al.	2019	31346958	UC	pTis-pT1	134	134 (100.0)	0 (0.0)	-	-	-	-	-	-	-	-	-
Wang et al.	2001	11684954	AC	-	17	15 (88.2)	2 (11.8)	-	-	15 (88.2)	0 (0.0)	-	-	-	-	-
			UC	-	10	10 (100.0)	0 (0.0)	-	-	10 (100.0)	0 (0.0)	-	-	-	-	-
Zhu et al.	2000	11123760	UC	pTis-pT4	46	19 (41.3)	22 (47.8)	-	-	-	5 (10.9)	-	-	-	-	-
				pTis-pT1	15	10 (66.7)	4 (26.7)	-	-	-	1 (0.6)	-	-	-	-	-
				pT2-4	31	9 (29.0)	18 (58.1)	-	-	-	4 (12.9)	-	-	-	-	-
total (N) / average (%)					2485	70.1	25	38.1	51.2	67.7	16	31.8	48.6
Samples were considered positive if grouped weak/moderate/strong or 1+/2+/3+. Samples were considered negative if gropued 0 or indicated as negative by the author. Samples were considered high if grouped moderate/strong or 2+/3+ and considered low if grouped weak or +1. Samples were grouped aberrant (cytoplacmic and/or nuclear, heterogeneous, negativ, non-membraneus) if indicated by the author. B…
