# Supplementary material
Source: Research Square preprint supplement (doi:10.21203/rs.3.rs-8639026/v1)
Supplement: Supplementary file 3 [file 2ccdda723cc5f1a17407d8c6.xlsx]

## Sheet: Sheet1
				β-Catenin (CTNNB1) IHC result
			n	0 (loss)	1+	2+	3+	1+ hetero	2+ hetero	3+ hetero	uneqivocal	eqivocal		uneqivocal vs not uneqivocal $	loss vs no loss §	hetero vs homogenous †	eqivocal vs not eqivocal †	1 vs 2 vs 3 †
		All cancers	1999	1.5	5.4	19	40	6.8	9.2	4.8	2.8	10.6
		pTa G2 low	327	0	0.3	18.3	69.1	2.4	6.1	3.4	0.3	0		0.2703	0.2512	0.0077	0.1156	0.2554
		pTa G2 high	132	0.8	2.3	17.4	65.9	1.5	4.5	6.1	1.5	0
		pTa G3	60	0	0	18.3	51.7	8.3	11.7	8.3	0	1.7
		pTa	519	0.2	0.774476	18.0825	66.3163	2.85498	6.34446	4.65611	0.6	0.2		<0.0001	0.0006	<0.0001	<0.0001	<0.0001
		pT2-4	1043	2	6.0367	18.4886	28.7525	8.43928	9.50266	4.77525	3.7	14.3
		pT2	329	1.8	5.8	13.4	35.6	7.3	7.9	6.4	4.3	17.6		0.307	0.01	0.7424	0.8447	<0.0001
		pT3	478	1.3	7.7	21.1	25.7	8.8	11.3	3.3	3.6	17.2
		pT4	236	4.7	3	20.3	25.4	9.3	8.1	5.5	5.9	17.8
	pT2-4 only	G2	105	1	11.4	20	33.3	8.6	11.4	1	3.8	9.5		0.9029	0.5434	0.6033	0.0465	0.2931
		G3	1303	1.9	6.6	19.2	30.5	8.4	9.7	5.2	3.7	14.7
		pN0	523	1	6.5	16.8	26.8	10.5	10.1	5.2	3.4	19.7		0.1968	0.0014	0.0207	0.1866	0.9092
		pN+	356	3.9	7.6	20.2	27.2	8.1	8.4	3.4	5.1	16
		UICC I-II	12	0	0	25	33.3	0	8.3	0	8.3	25		0.7904	0.0106	0.6031	0.5119	0.2072
		UICC III	57	0	14	21.1	31.6	3.5	1.8	12.3	3.5	12.3
		UICC IV	49	10.2	10.2	28.6	16.3	8.2	6.1	4.1	4.1	12.2
	Abbreviations - pT: pathological tumor stage; G: Grade; pN: pathological lymph node status; pM: pathological status of distant metastasis; UICC: Union for International Cancer Control; hetero: heterogeneous; unequivocal: unequivocal nuclear and cytoplasmic; equivocal: equivocal nuclear and cytoplasmic. $: 0 excluded; §: unequivocal excluded; †: 0/unequivocal excluded.

## Sheet: Sheet1 (2)
				CTNNB1 #7705 IHC result
			n	1H	1	2H	2	3H	3	nuc/cyto	Mut	0 (+)		2.85498	0.774476	6.34446	18.0825	4.65611	66.3163	0.767536	0	0.203596	100
		All cancers	1999	6.8	5.4	9.2	19	4.8	40	13.2	0.2	1.5		14.808	4.017	32.907	93.789	24.15	343.965	3.981	0	1.056	518.673
		pTa G2 low	327	2.4	0.3	6.1	18.3	3.4	69.1	0.3	0	0		7.848	0.981	19.947	59.841	11.118	225.957	0.981	0	0	326.673
		pTa G2 high	132	1.5	2.3	4.5	17.4	6.1	65.9	1.5	0	0.8		1.98	3.036	5.94	22.968	8.052	86.988	1.98	0	1.056	132
		pTa G3	60	8.3	0	11.7	18.3	8.3	51.7	1.7	0	0		4.98	0	7.02	10.98	4.98	31.02	1.02	0	0
														0	0	0	0	0	0	0	0	0
		pTa	519	2.85498	0.774476	6.34446	18.0825	4.65611	66.3163	0.767536	0	0.203596		14.8173	4.01953	32.9277	93.8481	24.1652	344.182	3.98351	0	1.05667
		pT2-4	1043	8.43928	6.0367	9.50266	18.4886	4.77525	28.7525	21.3924	0.385778	2.22685		88.0217	62.9627	99.1127	192.836	49.8058	299.889	223.122	0	0
														0	0	0	0	0	0	0	0	0
		pT2	329	7.3	5.8	7.9	13.4	6.4	35.6	21.9	0	1.8		24.017	19.082	25.991	44.086	21.056	117.124	72.051	0	5.922	329.329
		pT3	478	8.8	7.7	11.3	21.1	3.3	25.7	20.5	0.2	1.3		42.064	36.806	54.014	100.858	15.774	122.846	97.99	0.956	6.214	477.522
		pT4	236	9.3	3	8.1	20.3	5.5	25.4	22.5	1.3	4.7		21.948	7.08	19.116	47.908	12.98	59.944	53.1	3.068	11.092	236.236
	pT2-4 only	G2	105	8.6	11.4	11.4	20	1	33.3	13.3	0	1		88.029	62.968	99.121	192.852	49.81	299.914	223.141	4.024	23.228	1043.09
		G3	1303	8.4	6.6	9.7	19.2	5.2	30.5	18.1	0.3	1.9		8.43928	6.0367	9.50266	18.4886	4.77525	28.7525	21.3924	0.385778	2.22685	100
		pN0	523	1	6.5	10.5	16.8	10.1	26.8	5.2	0.2	22.9
		pN+	356	3.9	7.6	8.1	20.2	8.4	27.2	3.4	0.8	20.2
		R0	405	10.9	7.9	7.4	20.5	4.4	26.9	19.8	0	2.2
		R1	105	12.4	5.7	7.6	21	5.7	28.6	14.3	1	3.8
		L0	181	15.5	8.3	8.8	18.8	5	23.8	19.9	0	0
		L1	221	10.9	7.2	6.8	20.8	5	28.1	16.7	0.5	4.1
		V0	331	12.1	7.6	6.6	19.6	4.2	26.3	20.5	0.3	2.7
		V1	122	7.4	7.4	8.2	23	6.6	29.5	15.6	0	2.5
		UICC I-II	12	0	0	8.3	25	0	33.3	33.3	0	0
		UICC III	57	3.5	14	1.8	21.1	12.3	31.6	15.8	0	0
		UICC IV	49	8.2	10.2	6.1	28.6	4.1	16.3	16.3	0	10.2
