# Supplementary material
Source: Research Square preprint supplement (doi:10.21203/rs.3.rs-8639026/v1)
Supplement: Supplementary file 4 [file 38b2b964203f97478847193a.xlsx]

## Sheet: Tabelle1
	TMA study cohort (n=2710)
Follow up	636
months
mean	26.7
median	15
Tumor stage
pTa	887 (38.4%)
pT1	49 (2.1%)
pT2	462 (20.0%)
pT3	615 (26.6%)
pT4	298 (12.9%)
Tumor grade
G2	820 (30.6%)
G3	1858 (69.4%)
Lymph node metastasis
pN0	734 (62.0%)
pN+	449 (38.0%)
Resection margin
R0	595 (80.6%)
R1	143 (19.4%)
Lymphatic invasion
L0	275 (49.5%)
L1	281 (50.5%)
Vascular invasion
V0	450 (74.4%)
V1	155 (25.6%)
